**Running Title:** *Candida auris* TAC1B contributes to triazole resistance

**Keywords:** *Candida*, triazole, resistance, efflux, CRISPR, WGS

**Title:** Mutations in *TAC1B*: a novel genetic determinant of clinical fluconazole resistance in *C. auris*

**Authors:**

Jeffrey M. Rybak<sup>a</sup>  
José F. Muñoz<sup>b</sup>  
Katherine S. Barker<sup>a</sup>  
Josie E. Parker<sup>c</sup>  
Brooke D. Esquivel<sup>d</sup>  
Elizabeth L. Berkow<sup>e</sup>  
Shawn R. Lockhart<sup>e</sup>  
Lalitha Gade<sup>e</sup>  
Glen E. Palmer<sup>a</sup>  
Theodore C. White<sup>d</sup>  
Steve L. Kelly<sup>c</sup>  
Christina A. Cuomo<sup>b</sup>  
P. David Rogers<sup>a</sup>

<sup>a</sup> Department of Clinical Pharmacy and Translational Science, University of Tennessee College of Pharmacy, Memphis, Tennessee, USA

<sup>b</sup> Broad Institute of MIT and Harvard, Cambridge, MA, USA

<sup>c</sup> Centre for Cytochrome P450 Biodiversity, Institute of Life Science, Swansea University Medical School, Swansea SA2 8PP, UK

<sup>d</sup> School of Biological Sciences, University of Missouri at Kansas City, Kansas City, MO, USA

<sup>e</sup> Mycotic Diseases Branch, Centers for Disease Control and Prevention, U.S. Department of Health and Human Services, Atlanta, GA, USA;

\*Corresponding Author:

P. David Rogers, Pharm.D., Ph.D.  
Department of Clinical Pharmacy and Translational Science  
University of Tennessee College of Pharmacy  
881 Madison Avenue, Room 338  
Memphis, TN 38163  
Tel: +011 901 448-7217  
Fax: +011 901 448-1741  
E-mail: drogers@uthsc.edu

2 **ABSTRACT**

3

4 *Candida auris* has emerged as a multidrug-resistant pathogen of great clinical concern.  
5 Approximately 90% of clinical *C. auris* isolates are resistant to fluconazole, the most commonly  
6 prescribed antifungal agent, yet it remains unknown what mechanisms underpin this fluconazole  
7 resistance. To identify novel mechanisms contributing to fluconazole resistance in *C. auris*, the  
8 fluconazole-susceptible *C. auris* clinical isolate AR0387 was passaged in media supplemented  
9 with fluconazole to generate derivative strains which had acquired increased fluconazole  
10 resistance *in vitro*. Comparative analysis of comprehensive sterol profiles, [<sup>3</sup>H]-fluconazole  
11 uptake, sequencing of *C. auris* genes homologous to genes known to contribute to fluconazole  
12 resistance in other species of *Candida*, and the relative expression of *C. auris* *ERG11*, *CDR1*,  
13 and *MDR1* were performed. All fluconazole-evolved derivative strains were found to have  
14 acquired mutations in the zinc-cluster transcription factor-encoding gene, *TAC1B*, and a  
15 corresponding increase in *CDR1* expression relative to the parental clinical isolate, AR0387.  
16 Mutations in *TAC1B* were also identified in a set of 304 globally distributed *C. auris* clinical  
17 isolates representing each of the four major clades. Introduction of the most common mutation  
18 found among fluconazole-resistant clinical isolates of *C. auris* into the fluconazole-susceptible  
19 isolate AR0387, was confirmed to increase fluconazole resistance by 8-fold, and the correction  
20 of the same mutation in a fluconazole-resistant isolate, AR0390, decreased fluconazole MIC by  
21 16-fold. Taken together, these data demonstrate that *C. auris* can rapidly acquire resistance to  
22 fluconazole *in-vitro*, and that mutations in *TAC1B* significantly contribute to clinical fluconazole  
23 resistance.

24

25

26

27 **IMPORTANCE**

28

29 *Candida auris* is an emerging multidrug-resistant pathogen of global concern, known to be  
30 responsible for outbreaks on six continents and commonly resistant to antifungals. While the vast  
31 majority of clinical *C. auris* isolates are highly resistant to fluconazole, an essential part of the  
32 available antifungal arsenal, very little is known about the mechanisms contributing to resistance.  
33 In this work, we show that mutations in the transcription factor *TAC1B* significantly contribute to  
34 clinical fluconazole resistance. These studies demonstrate that mutations in *TAC1B* can arise  
35 rapidly *in vitro* upon exposure to fluconazole, and that a multitude of resistance-  
36 associated *TAC1B* mutations are present among the majority of fluconazole-resistant *C.*  
37 *auris* isolates from a global collection and appear specific to a subset of lineages or clades. Thus,  
38 identification of this novel genetic determinant of resistance significantly adds to the  
39 understanding of clinical antifungal resistance in *C. auris*.

40

41

42

43

44 **TEXT- 4371 words**

45 **INTRODUCTION**

46 First identified in 2009, *Candida auris* has rapidly become a healthcare-associated and  
47 multidrug-resistant pathogen of global concern.(1, 2) While originally found to be the causative  
48 pathogen of virtually simultaneous outbreaks of invasive candidiasis in Asia, South Africa, and  
49 South America, *C. auris* has now been identified in more than 30 countries across 6 continents,  
50 including more than 900 confirmed clinical cases of *C. auris* infections in the United States.(3)  
51 Further contributing to the clinical significance of this organism are its proclivity to colonize  
52 both environmental surfaces and patients, challenges associated with the reliable identification in  
53 the clinical microbiology laboratory, and the markedly decreased susceptibility to currently  
54 available antifungal agents found among a large proportion of *C. auris* clinical isolates.(4, 5)  
55 While epidemiologic data and clinical experience pertaining to the treatment of infections caused  
56 by *C. auris* are currently inadequate to support the establishment of epidemiologic cut-off values  
57 and true clinical breakpoints, the Center for Disease Control and Prevention (CDC) has proposed  
58 tentative breakpoints to help guide clinicians based upon available susceptibility data for *C. auris*  
59 clinical isolates. When these tentative breakpoints are applied, approximately 3% of *C. auris*  
60 clinical isolates are resistant to echinocandins, one third are resistant to amphotericin B, and 90%  
61 are resistant to fluconazole (minimum inhibitory concentration [MIC]  $\geq 32$ mg/L; modal MIC  
62  $\geq 256$ mg/L).(6) Additionally, one third of clinical isolates are multidrug-resistant, with elevated  
63 MIC for two or more different classes of antifungals, and clinical isolates resistant to all  
64 available agents have been repeatedly reported.(7, 8)

65 The extent of fluconazole resistance among *C. auris* isolates is particularly concerning as  
66 this agent remains the most commonly prescribed antifungal, and many of the outbreaks of *C.*

67 *auris* have occurred in resource-limited settings.(2, 8-11) While the pervasiveness of fluconazole  
68 resistance among *C. auris* clinical isolates substantially limits therapeutic options of *C. auris*  
69 infections, relatively little is known about the molecular mechanisms underpinning this  
70 resistance. One mechanism of fluconazole resistance repeatedly identified in *C. auris* is mutation  
71 of the gene encoding the sterol-demethylase enzyme targeted by the triazoles, *ERG11*. Three  
72 such mutations, encoding the amino acid substitutions VF125AL (commonly referred to as  
73 F126L), Y132F, and K143R, are frequently reported among fluconazole-resistant clinical  
74 isolates, and associations between these mutations and specific genetic clades of *C. auris* have  
75 been observed.(2) Additionally, the mutations encoding the Y132F and K143R substitutions  
76 correspond to mutations known to contribute to triazole resistance in other species of *Candida*  
77 such as *Candida albicans*.(12) While the direct impact of these *ERG11* mutations has not been  
78 delineated in *C. auris*, heterologous expression of *C. auris* *ERG11* alleles carrying mutations  
79 encoding either the Y132F or K143R amino acid substitutions on a low copy number episomal  
80 plasmid was observed to decrease fluconazole susceptibility in a haploid strain of  
81 *Saccharomyces cerevisiae*.(13) However, clinical isolates harboring the same *ERG11* mutations  
82 and exhibiting fluconazole MIC as low as 1mg/L have been described, as have fluconazole-  
83 resistant isolates of *C. auris* with no mutation in *ERG11*, suggesting the presence of yet to be  
84 identified mechanisms of fluconazole resistance.(8, 14)

85         In addition to mutations in *ERG11*, increased expression of efflux pump-encoding genes  
86 is a common contributor to clinical triazole resistance among multiple species of *Candida*.(15)  
87 Most notable of these is *C. glabrata*, in which nearly all of clinical triazole resistance is  
88 attributable to overexpression of the ATP-Binding Cassette (ABC)-type efflux pump encoding  
89 genes *CgCDR1*, *CgPDH1*, and *CgSNQ2*.(16) The *C. auris* genome has recently been revealed to

90 encode a substantial number of efflux pump encoding genes of both the ABC and Major  
91 Facilitator Superfamily (MFS) classes, and triazole-resistant isolates of *C. auris* have been  
92 observed to exhibit efflux pump activity greatly exceeding (up to 14-fold higher) that of *C.*  
93 *glabrata*.(17-19) Furthermore, the increased expression of the *C. auris* ABC-type efflux pump-  
94 encoding gene, *CDRI*, has previously been shown to substantially contribute to clinical triazole  
95 resistance.(20, 21) At present however, the genetic determinants underpinning the increased  
96 expression of efflux pump-encoding genes in *C. auris* remain unidentified.

97         In this work, we undertook an unbiased approach utilizing *in-vitro* evolution to create a  
98 collection of isogenic *C. auris* strains with increased fluconazole resistance, exhibiting an 8 to  
99 64-fold increase in fluconazole MIC. Characterization of these strains as well as analysis of  
100 whole genome sequencing data for over 300 globally-distributed *C. auris* isolates implicated  
101 *TAC1B* (B9J08\_004820), a close homolog of the well-characterized *C. albicans* transcriptional  
102 regulator *CaTAC1*, as a novel genetic determinant of clinical fluconazole resistance. Having  
103 identified *TAC1B* mutations to be present among a large proportion of fluconazole-resistant  
104 clinical isolates, we utilized a Cas9-mediated transformation system to both introduce the most  
105 common *TAC1B* mutation identified among resistant clinical isolates (encoding A640V) into the  
106 fluconazole-susceptible AR0387, as well as correct the A640V-encoding mutation in the  
107 previously characterized and highly fluconazole-resistant clinical isolate AR0390 to the wild-  
108 type sequence. In both cases, the presence of this prevalent *TAC1B* mutation was associated with  
109 significant increase in fluconazole MIC, demonstrating that mutations in *TAC1B* represent a  
110 prevalent and significant genetic determinant of fluconazole resistance among clinical *C. auris*  
111 isolates.

112

113 **RESULTS**

114 ***Candida auris* rapidly acquires increased fluconazole resistance *in-vitro*.** In an effort to  
115 identify novel mechanisms of fluconazole resistance in this emerging multidrug-resistant  
116 pathogen, a collection of isogenic strains with increased fluconazole resistance was created via  
117 *in-vitro* evolution utilizing the previously described fluconazole-susceptible *C. auris* clinical  
118 isolate AR0387 (also known as B8441) (**Figure 1**). Briefly, the parental AR0387 was grown in  
119 liquid cultures of YPD media supplemented with either 8 or 32 mg/L of fluconazole for 48  
120 hours. Each liquid culture was then plated on the standard antifungal susceptibility testing media,  
121 RPMI, supplemented with the same concentration of fluconazole for an additional 48 hours to  
122 identify individual colonies exhibiting increased fluconazole resistance. Two individual colonies  
123 were selected for characterization from the plate supplemented with 8mg/L of fluconazole  
124 (yielding strains FLU-A and FLU-B), and a single colony was selected from the plate  
125 supplemented with 32mg/L of fluconazole (yielding strain FLU-C). One strain from each initial  
126 passage, FLU-A and FLU-C, were subsequently subjected to a second passage in 64 and  
127 256mg/L of fluconazole supplemented media, respectively, yielding strains FLU-A2 and FLU-  
128 C2.

129 Fluconazole MIC were then determined for the parental AR0387 and each of the five  
130 fluconazole-evolved strains by broth microdilution in accordance with Clinical Laboratory  
131 Standards Institute methodology with minor modifications as previously described.(20) AR0387  
132 exhibited a fluconazole MIC of 1mg/L, while the five fluconazole-evolved strains were found to  
133 have MIC ranging from 8 to 64mg/L (**Figure 2**). Each of the second-generation evolved strains,  
134 FLU-A2 and FLU-C2, exhibited a further 2 to 4-fold increase in fluconazole MIC relative to  
135 their respective first-generation strains.

136  
137 **Fluconazole-evolved strains exhibit alterations in membrane sterols without accompanying**  
138 **mutations in *ERG11* or *ERG3*.** As fluconazole-resistant *C. auris* clinical isolates are very often  
139 found to possess mutations in *ERG11*, sequencing of the *ERG11* allele for each of the  
140 fluconazole-evolved strains was performed. Surprisingly, all evolved strains were found to have  
141 wildtype *ERG11* sequences matching that of the parental AR0387. To assess for other changes to  
142 the ergosterol biosynthesis pathway which may be contributing to fluconazole resistance, each of  
143 the fluconazole-evolved strains and the parental AR0387 were subsequently subjected to  
144 comprehensive sterol profiling. Briefly, each strain was grown to exponential growth phase in  
145 RPMI liquid media with or without 16mg/L of fluconazole (a concentration approximating the  
146 average serum concentration achieved in patients being treated for candidemia).(23)

147       Following growth in RPMI without fluconazole, all fluconazole-evolved strains and the  
148 parental AR0387 were observed to have largely similar sterol profiles (**Figure 3**). In all samples,  
149 ergosterol comprised more than 75% of total cellular sterols, with ergosta-5, 7, 22, 24(28)-  
150 tetraenol and zymosterol observed to be the next most abundant sterols. Intriguingly, four of the  
151 fluconazole-evolved strains (FLU-A, FLU-B, FLU-C, and FLU-A2) were also observed to have  
152 a small amount (2 to 4%) of 14-methyl-fecosterol present, while this sterol was absent in both  
153 AR0387 and FLU-C2. In *Candida albicans*, 14-methyl-fecosterol is a known substrate of the  
154 sterol-desaturase enzyme encoded by *CaERG3*, which catalyzes the conversion of 14-methyl-  
155 fecosterol to the toxic sterol associated with the antifungal activity of the triazoles, 14-methyl-  
156 ergosta-8, 24(28)-dienol-3,6-diol (**Figure 4**).

157       Following growth in RPMI supplemented with fluconazole, the sterol profiles of each of  
158 the fluconazole-evolved strains were dramatically different than that of AR0387 (**Figure 5**).

159 While ergosterol was still the predominant sterol among all five fluconazole-evolved strains,  
160 lanosterol (46%) and 14-methyl-fecosterol (21%) were observed to be the two most prevalent  
161 sterols in AR0387. Additionally, 14-methyl-ergosta-8, 24(28)-dienol-3,6-diol comprised 4% all  
162 sterols present in AR0387, while this sterol was absent in the sterol profiles of all fluconazole-  
163 evolved strains. As mutations in the sterol-desaturase encoding gene, *ERG3*, have been observed  
164 to contribute to fluconazole resistance in other species of *Candida*, and notable differences in the  
165 amount of cellular 14-methyl-fecosterol and 14-methyl-ergosta-8, 24(28)-dienol-3,6-diol were  
166 observed between AR0387 and the fluconazole-evolved strains, sequencing of the *C. auris* gene  
167 (B9J08\_003737) with the highest degree of homology to *C. albicans* *CaERG3* was performed.  
168 However, no mutation in *C. auris* *ERG3* was observed in any of the fluconazole-evolved strains.

169

170 **Fluconazole-evolved strains exhibit significantly reduced fluconazole uptake.** As triazoles  
171 including fluconazole have previously been shown to enter the cells of *C. albicans* via facilitated  
172 diffusion, deficient drug import was next examined as a potential mechanism contributing to the  
173 increased fluconazole resistance among the fluconazole-evolved strains.(24) As previously  
174 described, the accumulation of [<sup>3</sup>H]-fluconazole was assessed for AR0387 and each fluconazole-  
175 evolved strain, as well as a previously characterized strain of AR0387 where the *CDR1* gene has  
176 been deleted (AR0387\_Δ*cdr1*), following a two hour glucose starvation in YNB media without  
177 carbon source supplementation.(20) [<sup>3</sup>H]-fluconazole accumulation was observed to be reduced  
178 by approximately 50% in four of the fluconazole-evolved strains (FLU-A, FLU-B, FLU-C, and  
179 FLU-A2) relative to than that observed in AR0387 (**Figure 6A**), while accumulation in FLU-C2  
180 did not significantly differ from that of AR0387. Importantly, there was no difference in [<sup>3</sup>H]-  
181 fluconazole accumulation between AR0387 and AR0387\_Δ*cdr1* (**Figure 6B**), confirming that



182 the conditions used in this study for glucose starvation were adequate to remove the activity of  
183 this known *C. auris* resistance effector.  
184  
185 **Mutations in *TAC1B* are associated with significantly increased expression of *CDR1*.** Gain-  
186 of-function mutations in zinc-cluster transcription factor genes, such as *C. albicans* genes  
187 *CaUPC2*, *CaMRR1*, and *CaTAC1* are a well-characterized mechanism of fluconazole resistance  
188 among other species of *Candida*.<sup>(15)</sup> To determine if similar mutations may be contributing to  
189 the fluconazole resistance among the fluconazole-evolved strains in these studies, the *C. auris*  
190 genes with the highest degree of homology to the *C. albicans* transcriptional regulatory genes  
191 *CaUPC2*, *CaMRR1*, and *CaTAC1*, here named *UPC2* (B9J08\_000270), *MRR1* (B9J08\_004061),  
192 *TAC1A* (B9J08\_004819), and *TAC1B* (B9J08\_004820), were identified by BLAST and gene  
193 orthology analysis and sequencing was performed. As two *C. auris* genes possessing very high  
194 degrees of homology with *CaTAC1* were identified, both were included in this study. While no  
195 mutations were identified in *TAC1A* or *MRR1*, all five fluconazole-evolved strains were found to  
196 have mutations encoding amino acid substitutions in *TAC1B* (**Table 1**). Both the FLU-A strain  
197 its second-generation derivative FLU-A2 had acquired a mutation encoding the amino acid  
198 substitution R495G, while the strains FLU-B, FLU-C, and FLU-C2 all had acquired a mutation  
199 encoding the amino acid substitution F214S. Neither of these mutations correspond to previously  
200 characterized GOF mutations in *CaTAC1*, or orthologous genes from other species of *Candida*.  
201 However, these mutations are predicted to alter residues near or within the conserved fungal  
202 transcription factor middle homology region (MHR) of Tac1Bp, and multiple mutations  
203 encoding amino acid substitutions in the MHR of *CaTAC1* have previously been associated with  
204 fluconazole resistance.<sup>(25)</sup> Additionally, a sole mutation in *UPC2* encoding the amino acid

205 substitution M365I was identified in FLU-C2, and this mutation similarly alters a residue  
206 predicted to reside within the MHR of Upc2p.

207         In an effort to ascertain if the identified mutations in *TAC1B* and *UPC2* may be  
208 associated with altered expression of potential resistance effectors among the fluconazole-  
209 evolved strains, the relative expression of *ERG11*, *CDR1*, and *MDR1* was evaluated by RTqPCR.  
210 To accomplish this, AR0387 and each of the fluconazole-evolved strains were grown to  
211 exponential growth phase in RPMI media, and RNA was extracted as previously described. The  
212 expression of each gene of interest relative to AR0387 was assessed using the  $\Delta\Delta CT$  (threshold  
213 cycle) method and the *C. auris* *ACT1* housekeeping gene (B9J08\_000486).(20) Among all five  
214 fluconazole-evolved strains, the expression of *CDR1* was found to be 3 to 5-fold that of AR0387  
215 (**Figure 7**). This level of *CDR1* expression is similar to that previously described among  
216 extensively fluconazole-resistant *C. auris* clinical isolates.(20) Additionally, subtle variations in  
217 the expression of *ERG11*, and *MDR1*, not exceeding 2.1-fold that of AR0387, were also  
218 observed among individual fluconazole-evolved strains.

219         As copy number variations (CNV) among genes encoding fluconazole resistance  
220 effectors, such as *ERG11*, have previously been reported among clinical isolates and laboratory  
221 strains of *C. auris*, qPCR amplifying from genomic DNA was performed to assess for CNV  
222 among the effectors *ERG11*, *CDR1*, and *MDR1*, as well as *TAC1B*, for each of the fluconazole-  
223 evolved strains. (26, 27) For each gene of interest, three primer sets spanning the open reading  
224 frame were utilized. While no alteration in the copy number of *ERG11*, *CDR1*, or *MDR1* was  
225 observed, the second-generation fluconazole-evolved strain FLU-A2 was found to have a 2-fold  
226 increase in the copy number of *TAC1B*, which was not evident in other evolved strains (**Figure**  
227 **S1**).

228

229 ***TAC1B* mutations identified during *in-vitro* evolution studies are also present among**

230 **fluconazole-resistant *C. auris* clinical isolates.** Interrogation of a dataset consisting of whole

231 genome sequencing data for 304 globally distributed *C. auris* isolates representing each of the

232 four major clades revealed mutations in *TAC1B* to be present among 164 isolates (54%).(27)

233 Excluding sites which are fixed in all isolates within a clade, which are present in both sensitive

234 and resistant isolates, 14 non-synonymous *TAC1B* mutations and one deletion, were identified

235 (Figure 8, Table S1). Furthermore, the two *TAC1B* mutations that arose during *in-vitro* drug

236 selection were found to be present among fluconazole-resistant clinical *C. auris* isolates,

237 suggesting a possible role in clinical fluconazole resistance. R495G was found in a single Clade I

238 isolate, and the F214S change was found in 2 isolates from Clade II and 1 isolate from Clade IV

239 (Figure 8, Table S1). Notably, a mutation encoding the A640V amino acid substitution was

240 found to be the most common among clinical isolates, found in 57 Clade I isolates from 7

241 countries and always present with the *ERG11* mutation encoding the K143R amino acid

242 substitution. Nearly all (98.2%) of the isolates isolates with A640V and K143R mutations

243 displayed high-level fluconazole resistance (>64mg/L). Other common *TAC1B* mutations include

244 A657V in 15 Clade I isolates and a frame shift mutation F862\_N866del in 46 Clade IV isolates.

245 These mutations appeared in isolates with the *ERG11* Y132F variant, and these isolates have

246 markedly high MIC values (Figure 8), suggesting these mutations may provide additive

247 fluconazole resistance. Comparison of Tac1B protein sequences indicated *C. auris* A657V

248 corresponds to the CaTac1 GOF mutation A736V which is associated with increased triazole

249 resistance in *C. albicans*. Additionally, we observed three novel *TAC1B* mutations in Clade IV

250 isolates lacking resistance-associated mutations in *ERG11*, including K247E (n = 5), M653V (n

251 = 7) and A651T (n = 16), six resistant isolates from Clade I which harbored two *TAC1B*  
252 mutations (A15T and S195C), as well as two different mutations affecting the P595 site (P595L  
253 in Clade I and P595H in Clade IV).

254

255 **Mutations in *TAC1B* contribute to fluconazole resistance.** As mutations in *TAC1B* were  
256 identified among a large proportion of fluconazole-resistant *C. auris* clinical isolates, and the  
257 mutation encoding the amino acid substitution A640V was found to be the most prevalent among  
258 this large collection of clinical isolates, the direct impact of this mutation on fluconazole  
259 susceptibility was next determined using a Cas9-mediated transformation system. To accomplish  
260 this, the *TAC1B* allele from the previously characterized fluconazole-resistant *C. auris* clinical  
261 isolate AR0390 (also known as B11205, an isolate from Clade I), which contains the mutation  
262 encoding the amino acid substitution A640V, was introduced into the fluconazole-susceptible  
263 clinical isolate AR0387 using the Cas9-ribonucleoproteins (Cas9-RNP) and the *SAT-FLP* system  
264 as previously described.(20) Two independent positive transformants were obtained, and  
265 fluconazole MIC were determined by broth microdilution. Introduction of the *TAC1B*<sup>A640V</sup> allele  
266 to the native *TAC1B* locus was observed to increase fluconazole MIC 8-fold relative to the  
267 parental AR0387 (**Figure 9**). Conversely, when the same methods were used to introduce the  
268 wildtype *TAC1B* allele to isolate AR0390 (which harbors the *TAC1B* mutation encoding  
269 A640V), a 16-fold decrease in fluconazole MIC was observed (**Figure 9**). Fluconazole MIC did  
270 not differ between independent transformants.

271

272 **DISCUSSION**

273 *C. auris* has rapidly become a fungal pathogen of global concern. Among the  
274 characteristics most notably distinguishing this organism from other species of *Candida*, the  
275 prevalence of fluconazole resistance is of clear clinical concern. While mutations in the *ERG11*  
276 gene are strongly associated with clinical fluconazole resistance in *C. auris*, other genetic and  
277 molecular mechanisms contributing to fluconazole resistance in this organism are largely  
278 unknown.

279 In this work, we utilize both *in vitro* evolution and large-scale whole genome sequencing  
280 to identify mutations in *TAC1B* as a novel genetic determinant of fluconazole resistance.  
281 Mutations in *TAC1B* were identified among all fluconazole-evolved strains, and associated with  
282 altered sterol profiles, decreased [<sup>3</sup>H]-fluconazole uptake, and increased expression of *CDR1* and  
283 *TAC1B*. A large-scale analysis of whole genome sequencing data for over 300 *C. auris* clinical  
284 isolates revealed the majority of isolates to harbor mutations in *TAC1B*, including those  
285 mutations identified among fluconazole-evolved strains as well as mutations similar to known  
286 GOF mutations in *C. albicans TAC1*. Subsequently, Cas9-RNP mediated genetic manipulations  
287 demonstrated that the most common mutation found among fluconazole-resistant clinical isolates  
288 of *C. auris*, encoding the amino acid substitution A640V, alone was sufficient to elevate  
289 fluconazole resistance by 8-fold. Thus, mutations in *TAC1B* are both a potent genetic  
290 determinant contributing to clinical fluconazole resistance in *C. auris*, and prevalent among a  
291 large global collection of fluconazole-resistant clinical isolates. Further studies characterizing the  
292 interplay between mutations in *ERG11* and *TAC1B*, and the delineation of the *TAC1B* regulon in  
293 *C. auris* are needed.

294

295

## 296 **METHODS**

297 **Isolate, strains, and growth media used in this study.** Clinical isolates AR0387 and AR0390  
298 were made available by the CDC and FDA AR Isolate Bank as part of the *C. auris* collection of  
299 isolates. All constructed strains and clinical isolates were grown in YPD liquid media (1% yeast  
300 extract, 2% peptone, and 2% dextrose) at 30°C in a shaking incubator unless otherwise indicated.  
301 Frozen stocks of all strains and clinical isolates were prepared with 50% sterile glycerol and  
302 were maintained at -80°C.

303

304 **Minimum inhibitory concentration determination.** Fluconazole (Sigma) was prepared in  
305 DMSO. As previously described, modified Clinical and Laboratory Standards Institute document  
306 M27 methodology utilizing broth microdilution, RPMI liquid media, and reading absorbance at  
307 600 nm on a BioTek Synergy 2 microplate reader (BioTek, Winooski, VT), were used to  
308 determine fluconazole MIC as the lowest concentration at which 50% inhibition of growth was  
309 obtained.(28) All susceptibility testing was performed technical triplicate and biological  
310 duplicate.

311

312 **Comprehensive sterol profiling.** Fluconazole-evolved strains and the parental clinical isolate  
313 were grown to exponential growth phase at 30°C in RPMI liquid media with or without  
314 fluconazole supplemented at 16mg/L. Alcoholic KOH was used to extract nonsaponifiable lipids.  
315 A vacuum centrifuge (Heto) was used to dry samples, which were then derivatized by adding  
316 100 µl 90% N,O-bis(trimethylsilyl)- trifluoroacetamide–10% tetramethylsilane (TMS) (Sigma)  
317 and 200 µl anhydrous pyridine (Sigma) while heating at 80°C for 2 hours as previously

318 described.(23, 29) GC-MS (with a Thermo 1300 GC coupled to a Thermo ISQ mass  
319 spectrometer; Thermo Scientific) was used to analyze and identify TMS-derivatized sterols  
320 through comparison of the retention times and fragmentation spectra for known standards. Sterol  
321 profiles for each sample were determined by analyzing the integrated peak areas from GC-MS  
322 data files using Xcalibur software (Thermo Scientific). All sterol analysis was performed in  
323 biological triplicate.

324

325 **Assessment of [<sup>3</sup>H]-fluconazole uptake.** *C. auris* isolates and fluconazole-evolved strains were  
326 glucose-starved for 3 hours, and 200  $\mu$ L of concentrated cell pellets were added to 250  $\mu$ L of  
327 YNB without glucose and 50  $\mu$ L of freshly diluted 0.77  $\mu$ M [<sup>3</sup>H]-fluconazole, yielding a final  
328 [<sup>3</sup>H]-fluconazole concentration significantly below the MIC of each strain or isolate being tested  
329 (23.6 pg/L). Samples were then incubated at 30°C for 24 hours before 200  $\mu$ L of each sample  
330 was transferred to 5mL of stop solution (YNB +20 mM [6mg/L] unlabeled fluconazole) in a  
331 14mL round bottom tube. Samples were then filtered and dried on glass fiber filters, then washed  
332 with another 5mL of stop solution before the filters and cells were then transferred to a 5mL  
333 scintillation vial. A Beckman Coulter scintillation analyzer was then used to quantify the  
334 radioactivity of each filter following the addition of 3 ml of scintillation cocktail (Ecoscint XR,  
335 National Diagnostics). Experiments were performed with six biological replicates and all results  
336 were normalized to CPM per  $1 \times 10^8$  cells.

337

338 **Assessment of copy number variation by qPCR and relative gene expression by reverse**  
339 **transcription quantitative PCR.** For assessment of gene copy number variation, genomic DNA  
340 was isolated from each isolate or strain, and qPCR was performed three independent primer sets

341 spanning the open reading frame of each gene of interest, and the housekeeping gene *ACT1*,  
342 using SYBR green per the manufacturer's instructions and as previously described.(26) For  
343 assessment of relative gene expression, *C. auris* isolates and strains were inoculated into 2 mL of  
344 RPMI broth buffered with MOPS to pH 7.0 and grown overnight at 30°C for initiation.  
345 Overnight cultures were then diluted to an OD<sub>600</sub> of 0.1 in 10 mL of RPMI media with or without  
346 16 mg/mL of fluconazole and placed in a 50 mL conical tube. Cultures were then incubated for  
347 10 hours, confirmed to be exponential growth phase under these conditions, and then cells were  
348 collected by centrifugation, storing cell pellets at -80°C until isolation of RNA was performed.  
349 Synthesis of cDNA was performed using the RevertAid RT kit (Thermo Scientific), per the  
350 manufacturer's instructions. *C. auris* *ACT1*, *ERG11*, *CDR1*, and *MDR1* were then amplified  
351 from cDNA using SYBR green, PCR master mix, and parameters as previously described.(20)  
352 All experiments were performed in biological and technical triplicate. The  $2^{-\Delta\Delta CT}$  method was  
353 used to calculate relative expression of each gene of interest, and standard error was determined  
354 using  $\Delta CT$  values as previously described.(22, 30) Primers are listed in **Table S2**.

355

### 356 **Variant identification**

357 *TAC1A* (B9J08\_004819) and *TAC1B* (B9J08\_004820) mutations were identified in a set of 304  
358 globally distributed *Candida auris* isolates representing Clade I, II, III and IV(27). For this  
359 dataset read quality and filtering was performed using FastQC v0.11.5 and PRINSEQ v0.20.3  
360 (21278185) using "-trim\_left 15 -trim\_qual\_left 20 -trim\_qual\_right 20 -min\_len 100 -  
361 min\_qual\_mean 25 -derep 14". Then, paired-end reads were aligned to the *C. auris* assembly  
362 strain B8441 (GenBank accession PEKT00000000.2; (30559369)) using BWA mem v0.7.12  
363 (19451168) and variants were identified using GATK v3.7 (20644199) with the haploid mode



364 and GATK tools (RealignerTargetCreator, IndelRealigner, HaplotypeCaller for both SNPs and  
365 indels, CombineGVCFs, GenotypeGVCFs, GatherVCFs, SelectVariants, and Variant Filtration).  
366 Sites were filtered with Variant Filtration using "QD < 2.0 || FS > 60.0 || MQ < 40.0". Genotypes  
367 were filtered if the minimum genotype quality < 50, percent alternate allele < 0.8, or depth < 10  
368 ([https://github.com/broadinstitute/broad-](https://github.com/broadinstitute/broad-fungalgroup/blob/master/scripts/SNPs/filterGatkGenotypes.py)  
369 [fungalgroup/blob/master/scripts/SNPs/filterGatkGenotypes.py](https://github.com/broadinstitute/broad-fungalgroup/blob/master/scripts/SNPs/filterGatkGenotypes.py)). Genomic variants were  
370 annotated and the functional effect was predicted using SnpEff v4.3T (22728672). The annotated  
371 VCF file was used to determine the genotype of known mutation sites in *ERG11*  
372 (B9J08\_001448) and mutations in *TAC1A* (B9J08\_004819) and *TAC1B* (B9J08\_004820).

373

#### 374 **Antifungal susceptibility testing for global collection of isolates**

375 Fluconazole susceptibility testing was included for 294 of 304 isolates included in whole genome  
376 analyses. A total of 270 isolates were tested at the CDC as outlined by Clinical and Laboratory  
377 Standards Institute guidelines. Briefly, custom prepared microdilution plates (Trek Diagnostics,  
378 Oakwood Village, OH, USA) were used for fluconazole. Resistance to fluconazole was set at  
379  $\geq 32$  mg/L. This interpretive breakpoint was defined based on a combination of these breakpoints  
380 and those established for other closely related *Candida* species, epidemiologic cutoff values, and  
381 the biphasic distribution of MICs between the isolates with and without known mutations for  
382 antifungal resistance (<https://www.cdc.gov/fungal/candida-auris/c-auris-antifungal.html>).

383

384 **Cas9-Ribonucleoprotein mediated transformations.** *C. auris* Cas9 and electroporation-  
385 mediated transformations were performed as previously described with minor modification.(20)  
386 The *C. auris* *TAC1B* alleles from AR0387 (*TAC1B*<sup>WT</sup>) and AR0390 (*TAC1B*<sup>A640V</sup>) were

387 amplified from genomic DNA, then cloned into the plasmid pBSS2 using restriction enzymes  
388 SacII and EagI, yielding the plasmids pBSS2-*TAC1B*<sup>WT</sup> and pBSS2-*TAC1B*<sup>A640V</sup>. Repair  
389 templates for each allele of interest were then amplified from each plasmid using primers that  
390 also introduced approximately 50 bases of homology targeting the *TAC1B* loci to the 3' end of  
391 the repair templates. Primers are listed in **Table S2**. Electrocompetent *C. auris* cells were  
392 prepared as previously described. Approximately 4 μM of dual Cas9-RNP that target both the  
393 *TAC1B* allele and the sequence immediately downstream of the open reading frame, as well as 1  
394 μg of repair template were mixed with cells prior to electroporation according to the *C. albicans*  
395 protocol on a GenePulsar Xcell (Bio-Rad).(24) Cells were then allowed to recover for 4 to 6  
396 hours in YPD, incubating in a shaking incubator at 30°C. Transformants were then selected by  
397 plating recovered cells on YPD plates supplemented with 400 μg/mL of nourseothricin.  
398 Integration of the repair template at the targeted loci was then confirmed by PCR for all  
399 transformants. The *FLP* recombinase was then induced by growing positive transformants in  
400 YPM (1% yeast extract, 2% peptone, and 2% maltose) to mediate loss of the *SATI-FLP* cassette.  
401 All final strains identified to have lost the *SATI-FLP* cassette by replica plating as previously  
402 described, were then again confirmed by sequencing.(18)

403

#### 404 **Data and resource availability**

405 All Illumina sequence analyzed in this project is available in the NCBI SRA under BioProjects  
406 PRJNA328792, PRJNA470683, PRJNA493622. A set of isolates are available from the CDC  
407 and FDA Antimicrobial Resistance (AR) Isolate Bank  
408 (<https://www.cdc.gov/drugresistance/resistance-bank/index.html>).

409

410

411 **ACKNOWLEDGMENTS**

412 The authors thank the CDC for providing the *C. auris* isolates used in this study as part of the  
413 CDC & FDA Antibiotic Resistance Isolate Bank program. This work was supported by NIH  
414 NIAID grant R01 A1058145 awarded to P.D.R. CAC and JFM were supported by NIAID award  
415 U19AI110818 to the Broad Institute. CAC is a CIFAR fellow in the Fungal Kingdom Program.

416

417 **DISCLAIMER:** The findings and conclusions in this report are those of the author(s) and do not  
418 necessarily represent the official position of the Centers for Disease Control and Prevention.

419

## 420 REFERENCES

- 421 1. Satoh K, Makimura K, Hasumi Y, Nishiyama Y, Uchida K, Yamaguchi H. 2009. *Candida auris* sp.  
422 nov., a novel ascomycetous yeast isolated from the external ear canal of an inpatient in a  
423 Japanese hospital. *Microbiol Immunol* 53:41-4.
- 424 2. Lockhart SR, Etienne KA, Vallabhaneni S, Farooqi J, Chowdhary A, Govender NP, Colombo AL,  
425 Calvo B, Cuomo CA, Desjardins CA, Berkow EL, Castanheira M, Magobo RE, Jabeen K, Asghar RJ,  
426 Meis JF, Jackson B, Chiller T, Litvintseva AP. 2017. Simultaneous Emergence of Multidrug-  
427 Resistant *Candida auris* on 3 Continents Confirmed by Whole-Genome Sequencing and  
428 Epidemiological Analyses. *Clin Infect Dis* 64:134-140.
- 429 3. Anonymous. December 11th. Tracking *Candida auris*. [https://www.cdc.gov/fungal/candida-](https://www.cdc.gov/fungal/candida-auris/tracking-c-auris.html)  
430 [auris/tracking-c-auris.html](https://www.cdc.gov/fungal/candida-auris/tracking-c-auris.html). Accessed January 16th.
- 431 4. Lockhart SR. 2019. *Candida auris* and multidrug resistance: Defining the new normal. *Fungal*  
432 *Genet Biol* 131:103243.
- 433 5. Caceres DH, Forsberg K, Welsh RM, Sexton DJ, Lockhart SR, Jackson BR, Chiller T. 2019. *Candida*  
434 *auris*: A Review of Recommendations for Detection and Control in Healthcare Settings. *J Fungi*  
435 (Basel) 5.
- 436 6. Anonymous. January 2nd, 2020. *Candida auris*: Antifungal Susceptibility Testing and  
437 Interpretation, on Centers for Disease Control and Prevention.  
438 <https://www.cdc.gov/fungal/candida-auris/c-auris-antifungal.html>. Accessed January 16th.
- 439 7. Ostrowsky B, Greenko J, Adams E, Quinn M, O'Brien B, Chaturvedi V, Berkow E, Vallabhaneni S,  
440 Forsberg K, Chaturvedi S, Lutterloh E, Blog D, Group CalW. 2020. *Candida auris* Isolates Resistant  
441 to Three Classes of Antifungal Medications - New York, 2019. *MMWR Morb Mortal Wkly Rep*  
442 69:6-9.
- 443 8. Chowdhary A, Prakash A, Sharma C, Kordalewska M, Kumar A, Sarma S, Tarai B, Singh A,  
444 Upadhyaya G, Upadhyay S, Yadav P, Singh PK, Khillan V, Sachdeva N, Perlin DS, Meis JF. 2018. A  
445 multicentre study of antifungal susceptibility patterns among 350 *Candida auris* isolates (2009-  
446 17) in India: role of the ERG11 and FKS1 genes in azole and echinocandin resistance. *J*  
447 *Antimicrob Chemother* 73:891-899.
- 448 9. Vallabhaneni S, Baggs J, Tsay S, Srinivasan AR, Jernigan JA, Jackson BR. 2018. Trends in antifungal  
449 use in US hospitals, 2006-12. *J Antimicrob Chemother* 73:2867-2875.
- 450 10. Adam RD, Revathi G, Okinda N, Fontaine M, Shah J, Kagotho E, Castanheira M, Pfaller MA, Maina  
451 D. 2019. Analysis of *Candida auris* fungemia at a single facility in Kenya. *Int J Infect Dis* 85:182-  
452 187.
- 453 11. Al Maani A, Paul H, Al-Rashdi A, Wahaibi AA, Al-Jardani A, Al Abri AMA, AlBalushi MAH, Al-Abri S,  
454 Al Reesi M, Al Maqbali A, Al Kasaby NM, de Groot T, Meis JF, Al-Hatmi AMS. 2019. Ongoing  
455 Challenges with Healthcare-Associated *Candida auris* Outbreaks in Oman. *J Fungi* (Basel) 5.
- 456 12. Flowers SA, Colon B, Whaley SG, Schuler MA, Rogers PD. 2015. Contribution of clinically derived  
457 mutations in ERG11 to azole resistance in *Candida albicans*. *Antimicrob Agents Chemother*  
458 59:450-60.
- 459 13. Healey KR, Kordalewska M, Jimenez Ortigosa C, Singh A, Berrio I, Chowdhary A, Perlin DS. 2018.  
460 Limited ERG11 Mutations Identified in Isolates of *Candida auris* Directly Contribute to Reduced  
461 Azole Susceptibility. *Antimicrob Agents Chemother* 62.
- 462 14. Escandon P, Chow NA, Caceres DH, Gade L, Berkow EL, Armstrong P, Rivera S, Misas E, Duarte C,  
463 Moulton-Meissner H, Welsh RM, Parra C, Pescador LA, Villalobos N, Salcedo S, Berrio I, Varon C,  
464 Espinosa-Bode A, Lockhart SR, Jackson BR, Litvintseva AP, Beltran M, Chiller TM. 2019.  
465 Molecular Epidemiology of *Candida auris* in Colombia Reveals a Highly Related, Countrywide  
466 Colonization With Regional Patterns in Amphotericin B Resistance. *Clin Infect Dis* 68:15-21.

- 467 15. Whaley SG, Berkow EL, Rybak JM, Nishimoto AT, Barker KS, Rogers PD. 2016. Azole Antifungal  
468 Resistance in *Candida albicans* and Emerging Non-*albicans* *Candida* Species. *Front Microbiol*  
469 7:2173.
- 470 16. Whaley SG, Zhang Q, Caudle KE, Rogers PD. 2018. Relative Contribution of the ABC Transporters  
471 Cdr1, Pdh1, and Snq2 to Azole Resistance in *Candida glabrata*. *Antimicrob Agents Chemother* 62.
- 472 17. Ben-Ami R, Berman J, Novikov A, Bash E, Shachor-Meyouhas Y, Zakin S, Maor Y, Tarabia J,  
473 Schechner V, Adler A, Finn T. 2017. Multidrug-Resistant *Candida haemulonii* and *C. auris*, Tel  
474 Aviv, Israel. *Emerg Infect Dis* 23.
- 475 18. Munoz JF, Gade L, Chow NA, Loparev VN, Juieng P, Berkow EL, Farrer RA, Litvintseva AP, Cuomo  
476 CA. 2018. Genomic insights into multidrug-resistance, mating and virulence in *Candida auris* and  
477 related emerging species. *Nat Commun* 9:5346.
- 478 19. Wasi M, Khandelwal NK, Moorhouse AJ, Nair R, Vishwakarma P, Bravo Ruiz G, Ross ZK, Lorenz A,  
479 Rudramurthy SM, Chakrabarti A, Lynn AM, Mondal AK, Gow NAR, Prasad R. 2019. ABC  
480 Transporter Genes Show Upregulated Expression in Drug-Resistant Clinical Isolates of *Candida*  
481 *auris*: A Genome-Wide Characterization of ATP-Binding Cassette (ABC) Transporter Genes. *Front*  
482 *Microbiol* 10:1445.
- 483 20. Rybak JM, Doorley LA, Nishimoto AT, Barker KS, Palmer GE, Rogers PD. 2019. Abrogation of  
484 Triazole Resistance upon Deletion of CDR1 in a Clinical Isolate of *Candida auris*. *Antimicrob*  
485 *Agents Chemother* 63.
- 486 21. Kim SH, Iyer KR, Pardeshi L, Munoz JF, Robbins N, Cuomo CA, Wong KH, Cowen LE. 2019. Genetic  
487 Analysis of *Candida auris* Implicates Hsp90 in Morphogenesis and Azole Tolerance and Cdr1 in  
488 Azole Resistance. *mBio* 10.
- 489 22. Liu Z, Myers LC. 2017. Mediator Tail Module Is Required for Tac1-Activated CDR1 Expression and  
490 Azole Resistance in *Candida albicans*. *Antimicrob Agents Chemother* 61.
- 491 23. Rybak JM, Dickens CM, Parker JE, Caudle KE, Manigaba K, Whaley SG, Nishimoto AT, Luna-Tapia  
492 A, Roy S, Zhang Q, Barker KS, Palmer GE, Sutter TR, Homayouni R, Wiederhold NP, Kelly SL,  
493 Rogers PD. 2017. Loss of C-5 Sterol Desaturase Activity Results in Increased Resistance to Azole  
494 and Echinocandin Antifungals in a Clinical Isolate of *Candida parapsilosis*. *Antimicrob Agents*  
495 *Chemother* 61.
- 496 24. Mansfield BE, Oltean HN, Oliver BG, Hoot SJ, Leyde SE, Hedstrom L, White TC. 2010. Azole drugs  
497 are imported by facilitated diffusion in *Candida albicans* and other pathogenic fungi. *PLoS*  
498 *Pathog* 6:e1001126.
- 499 25. Nishimoto AT, Sharma C, Rogers PD. 2019. Molecular and genetic basis of azole antifungal  
500 resistance in the opportunistic pathogenic fungus *Candida albicans*. *J Antimicrob Chemother*  
501 doi:10.1093/jac/dkz400.
- 502 26. Bhattacharya S, Holowka T, Orner EP, Fries BC. 2019. Gene Duplication Associated with  
503 Increased Fluconazole Tolerance in *Candida auris* cells of Advanced Generational Age. *Sci Rep*  
504 9:5052.
- 505 27. Chow NA, Muñoz JF, Gade L, Berkow E, Li X, Welsh RM, Forsberg K, Lockhart SR, Adam R, Alanio  
506 A, Alastruey-Izquierdo A, Althawadi S, Belén Araúz A, Ben-Ami R, Bharat A, Calvo B, Desnos-  
507 Ollivier M, Escandón P, Gardam D, Gunturu R, Heath CH, Kurzai O, Martin R, Litvintseva AP,  
508 Cuomo CA. 2020. Tracing the evolutionary history and global expansion of *Candida*  
509 *auris* using population genomic analyses. *bioRxiv*  
510 doi:10.1101/2020.01.06.896548:2020.01.06.896548.
- 511 28. CLSI. 2017. Reference Method for Broth Dilution Antifungal Susceptibility Testing of Yeast;  
512 Approved Standard-Fourth Edition. Clinical and Laboratory Standards Institute.

- 513 29. Kelly SL, Lamb DC, Kelly DE, Manning NJ, Loeffler J, Hebart H, Schumacher U, Einsele H. 1997.  
514 Resistance to fluconazole and cross-resistance to amphotericin B in *Candida albicans* from AIDS  
515 patients caused by defective sterol delta5,6-desaturation. *FEBS Lett* 400:80-2.
- 516 30. Dunkel N, Liu TT, Barker KS, Homayouni R, Morschhauser J, Rogers PD. 2008. A gain-of-function  
517 mutation in the transcription factor Upc2p causes upregulation of ergosterol biosynthesis genes  
518 and increased fluconazole resistance in a clinical *Candida albicans* isolate. *Eukaryot Cell* 7:1180-  
519 90.
- 520
- 521

522 **FIGURE LEGENDS**

523

524 **Figure 1. Schematic of *C. auris* fluconazole *in-vitro* evolution experiments.** AR0387 was  
525 cultured in YPD supplemented with 8 or 32mg/L of fluconazole. Cultures were plated on RPMI  
526 containing the same concentration of fluconazole, and individual colonies were picked for  
527 further characterization. Fluconazole-evolved strains FLU-A and FLU-C were subsequently  
528 further passaged in YPD supplemented with 64 and 256mg/L of fluconazole, respectively.  
529 Cultures were then again plated on RPMI containing the same concentration of fluconazole and  
530 individual colonies were picked for further characterization.

531

532

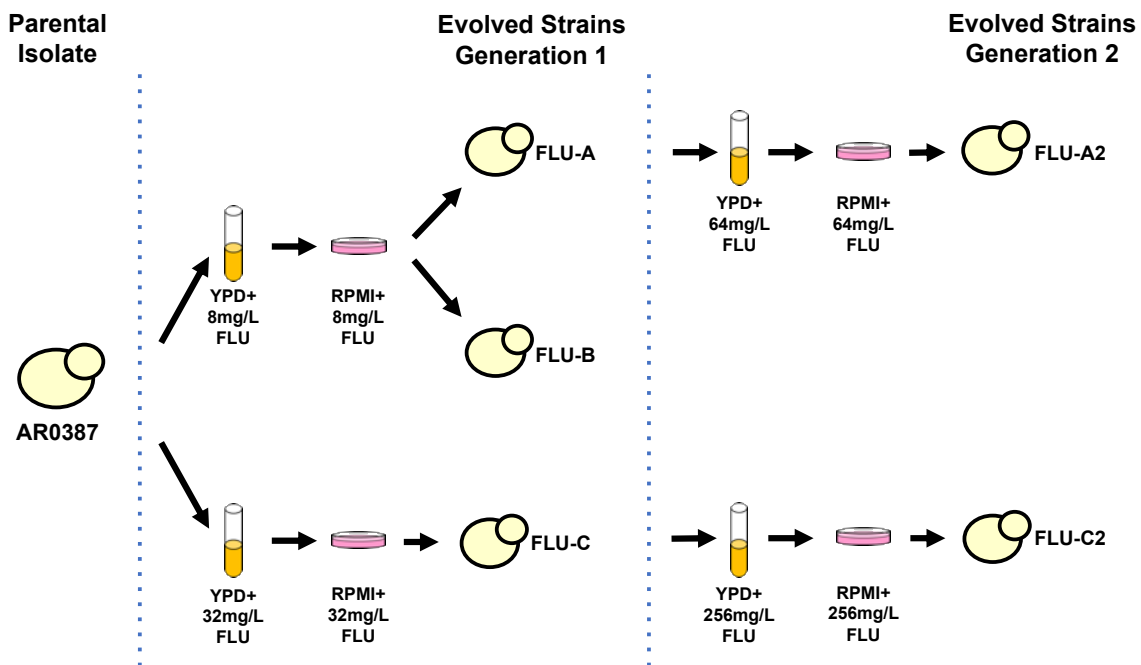

533

534

535

536 **Figure 2. MIC of *C. auris* fluconazole-evolved strains.** Percentage growth of AR0387 and  
537 fluconazole-evolved strains with escalating concentrations of fluconazole measured at 24 hours.  
538 Percent growth was determined relative to respective untreated controls as assessed by  
539 absorbance at OD<sub>600</sub>.  
540

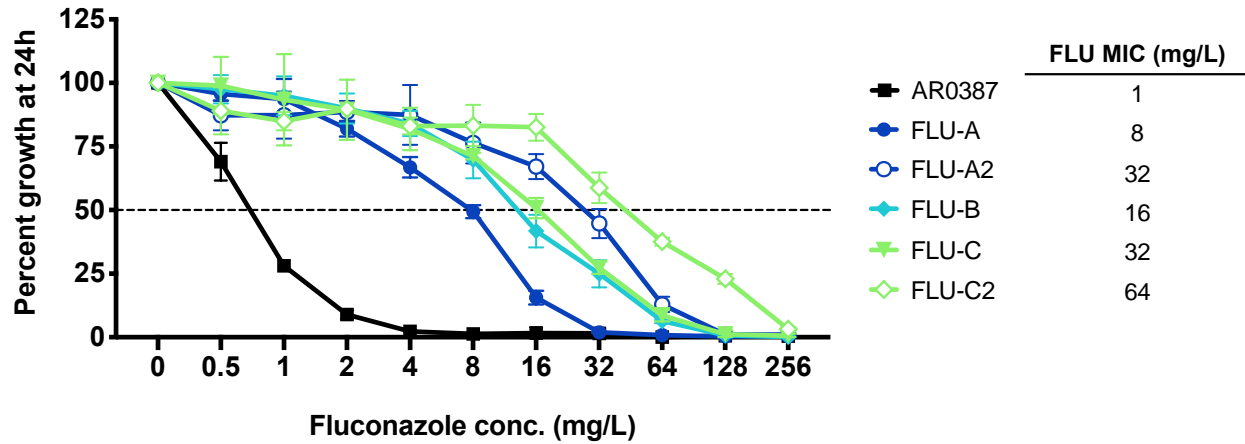

541

542



543 **Figure 3. Sterol profiles of *C. auris* evolved strains.** The major constituent sterols for AR0387  
544 and fluconazole-evolved strains at exponential growth phase in RPMI are shown as the  
545 proportion of total cellular sterols.  
546

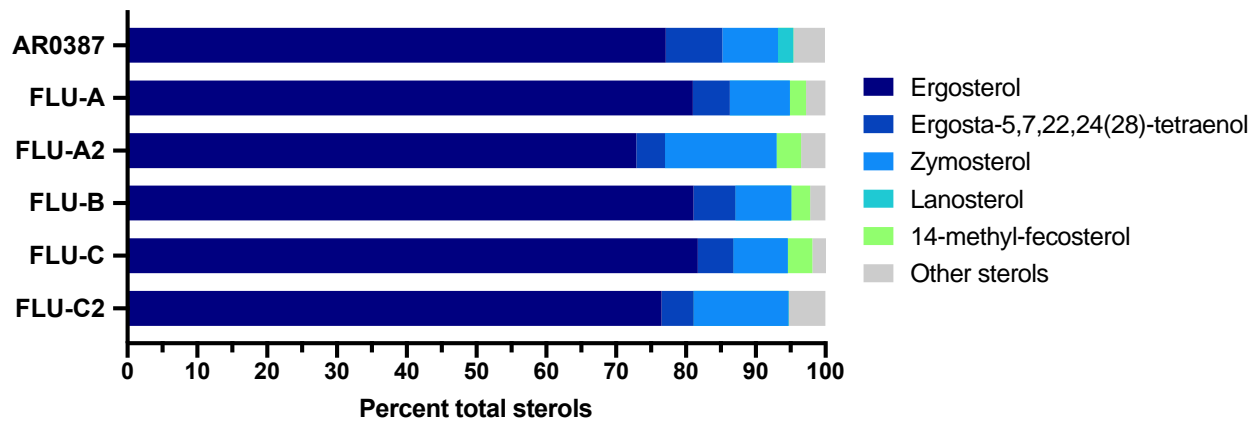

547

548

549 **Figure 4. Predicted *C. auris* sterol biosynthesis pathway.** The major constituent sterols  
 550 identified in sterol profiles are shown with corresponding colors.  
 551

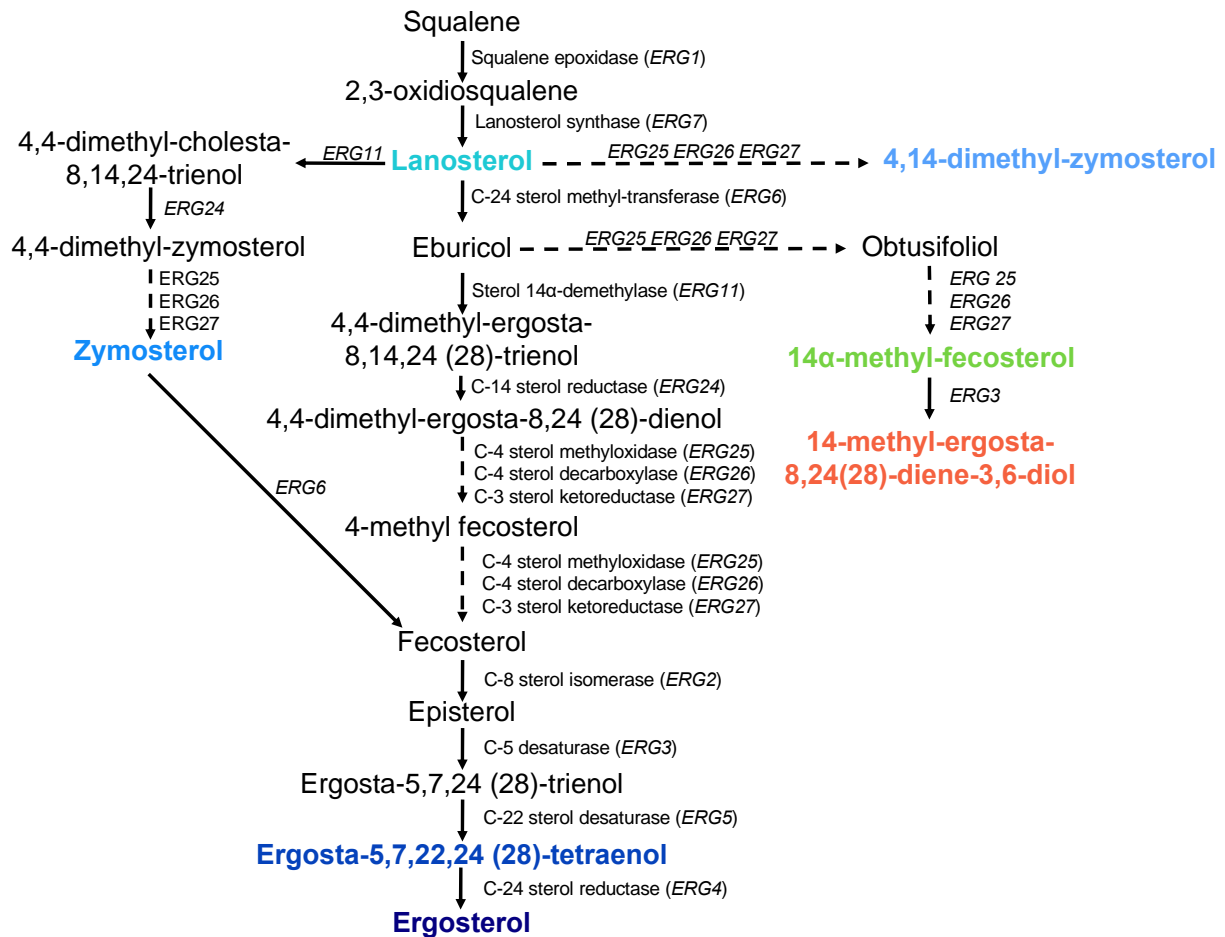

552

553

554 **Figure 5. Sterol profiles of *C. auris* evolved strains with fluconazole exposure.** The major  
555 constituent sterols for AR0387 and fluconazole-evolved strains at exponential growth phase in  
556 RPMI supplemented with 16mg/L fluconazole are shown as the proportion of total cellular  
557 sterols.  
558

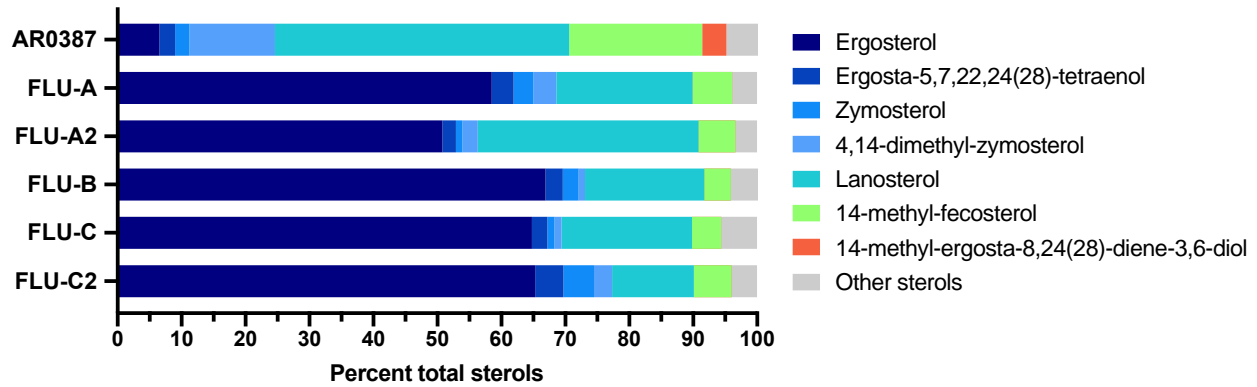

561 **Figure 6. Intracellular accumulation of [<sup>3</sup>H]-fluconazole among fluconazole-evolved strains.**  
562 [<sup>3</sup>H]-labeled fluconazole uptake in (a) fluconazole-evolved strains and (b) *CDR1*-deletion strain,  
563 compared to the parental clinical isolate AR0387.  
564

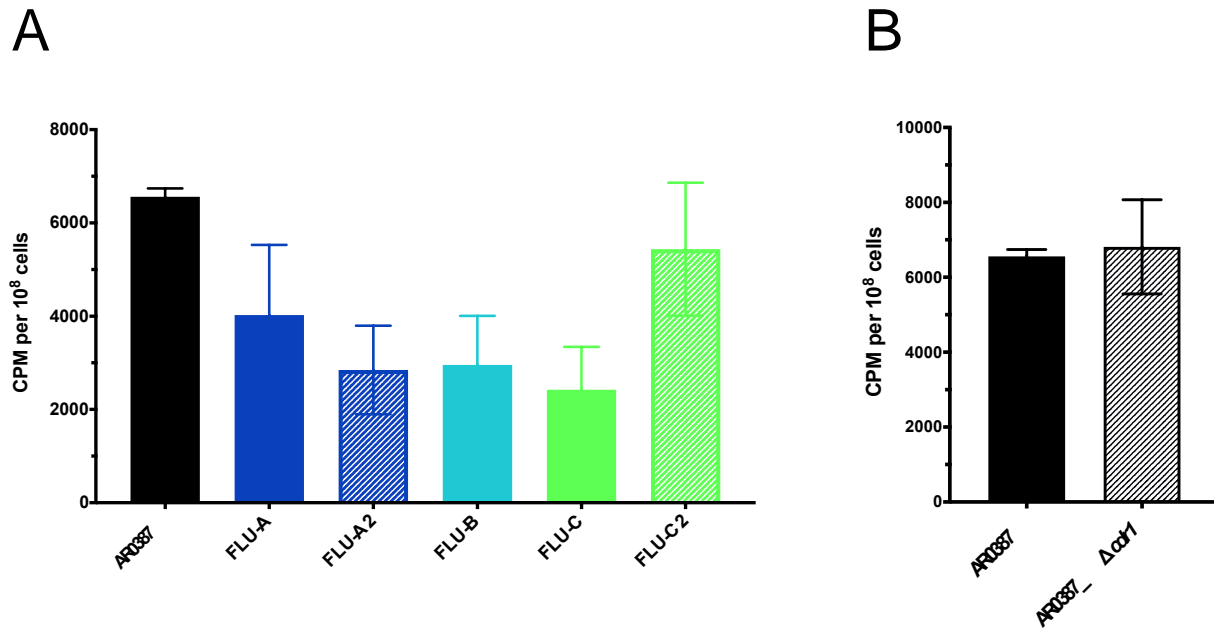

565

566

567 **Figure 7. Relative expression of *C. auris* *ERG11*, *CDR1*, and *MDR1* among fluconazole-**  
568 **evolved strains grown to exponential growth phase in RPMI.** The expression of *C. auris*  
569 *ERG11*, *CDR1*, and *MDR1* among AR0387 and the fluconazole-evolved strains were determined  
570 following culturing to exponential growth phase at 30°C in RPMI. The expression level for each  
571 sample is shown relative to that of the respective gene in AR0387. Arrows between graphs  
572 indicate lineage of each fluconazole-evolved strain from the parental AR0387.  
573  
574

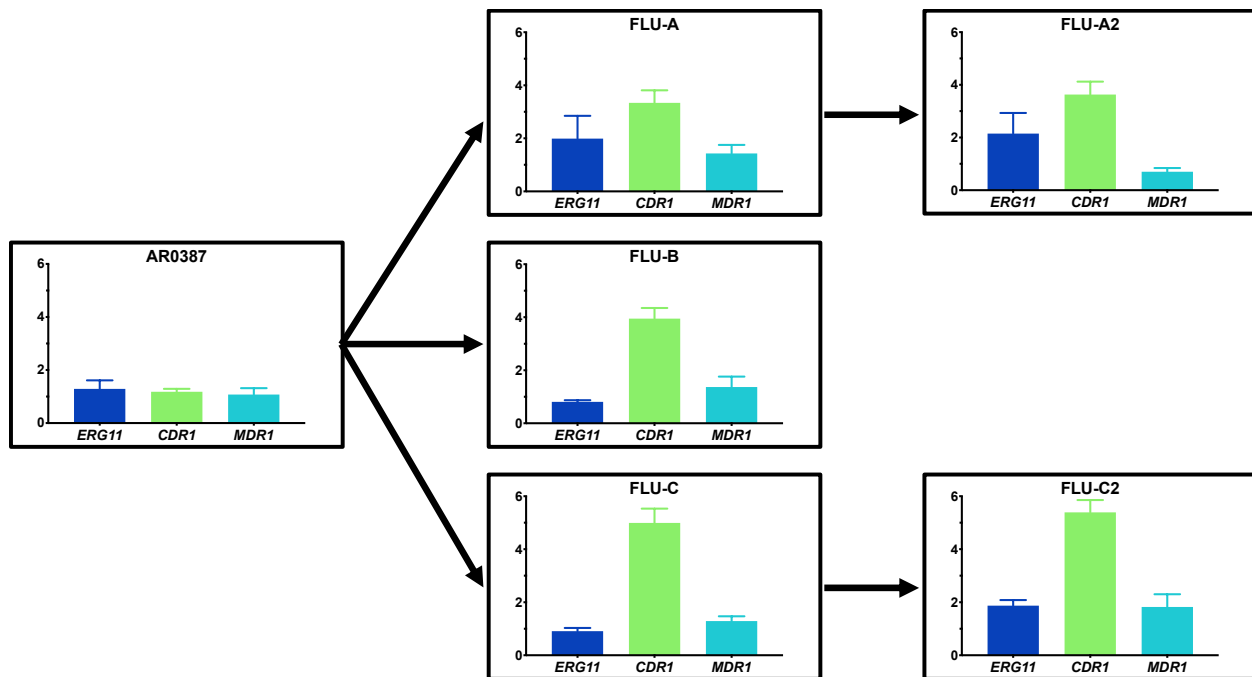

575

576

577

578

579 **Figure 8. Point mutations *TAC1B* and fluconazole susceptibility in *C. auris*.** (a) Phylogenetic  
 580 tree of SNPs identified from 304 *C. auris* whole-genome sequences from four major clades (I, II,  
 581 III and IV). Isolate label background are color-coded by known mutations in *ERG11*  
 582 (B9J08\_001448)(Y132F, K143R, F126L). Susceptibility to fluconazole is depicted as resistant  
 583 (dark-gray) or susceptible (yellow), and the minimal inhibitory concentration (MIC) value is  
 584 indicated as dark-blue boxes. The red dotted line indicates the tentative MIC breakpoint to  
 585 fluconazole ( $\geq 32$  mg/L). Green circles indicate isolates harboring non-clade specific non-  
 586 synonymous mutations or gain-of-function mutations in *TAC1B* (B9J08\_004820), with filled  
 587 circles corresponding to percent alternate allele of  $\geq 0.8$  while open green circles correspond to  
 588 percent alternate allele of 0.67 to 0.79. The specific mutation is indicated for each isolate(s).  
 589 Mutations in bold/dark-blue arose in *in-vitro* evolution experiments or were functionally tested in  
 590 this study and associated with increased resistant to fluconazole in *C. auris*. (b) Mutations and  
 591 location in *TAC1B* protein sequence associated with azole resistance are indicated using  
 592 triangles. Mutations in bold/dark blue (red triangles) arose in *in-vitro* evolution experiments or  
 593 were functionally tested in this study and associated with increased resistant to fluconazole in *C.*  
 594 *auris*. The size of the triangle indicates the number of isolates from this study harboring the  
 595 mutation (range: 1 to 57 isolates)  
 596

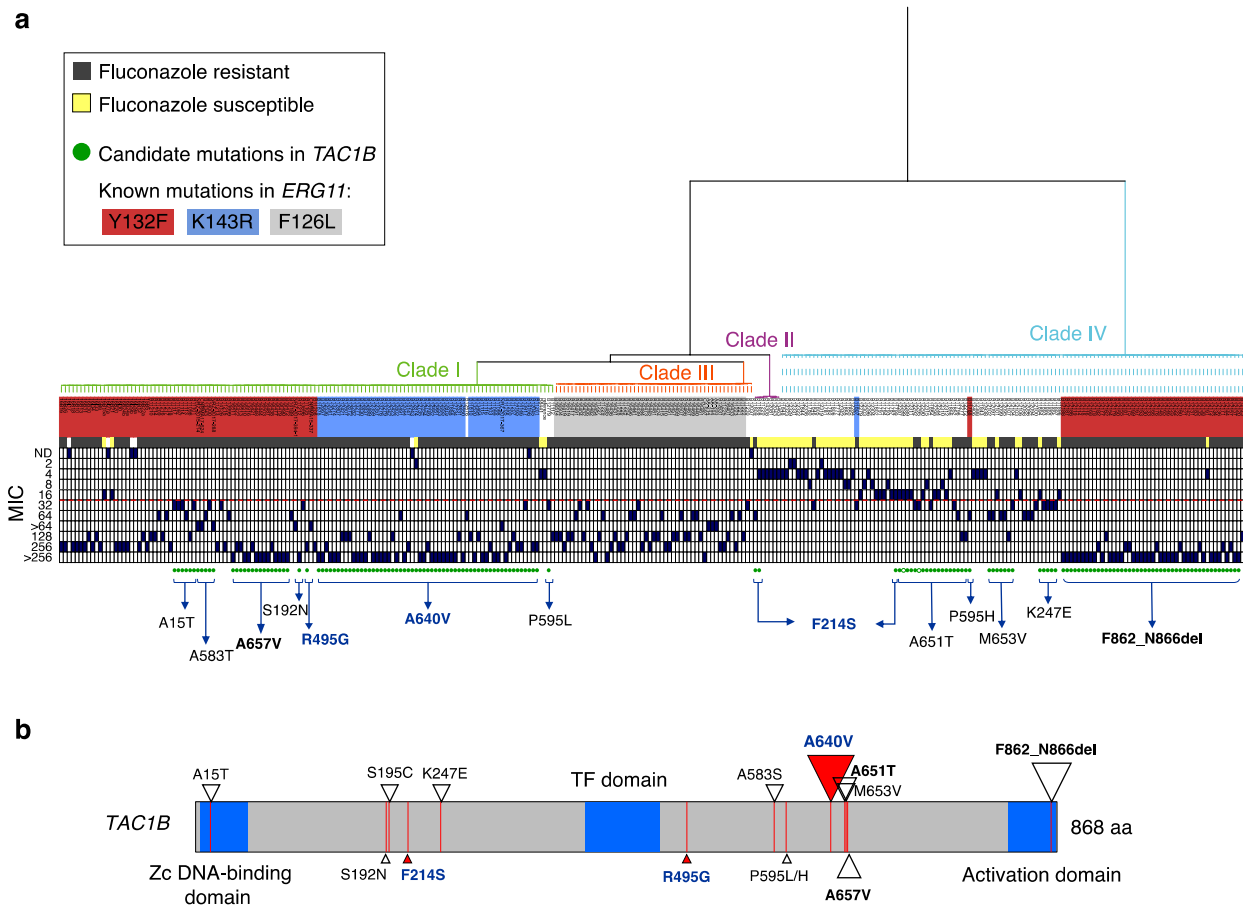

597

598

599 **Figure 9. Fluconazole MIC for *TAC1B* strains.** Percentage growth of AR0387, AR0390, and  
600 their derivative *TAC1B* strains with escalating concentrations of fluconazole measured at 24  
601 hours. Percent growth was determined relative to respective untreated controls as assessed by  
602 absorbance at OD<sub>600</sub>.  
603

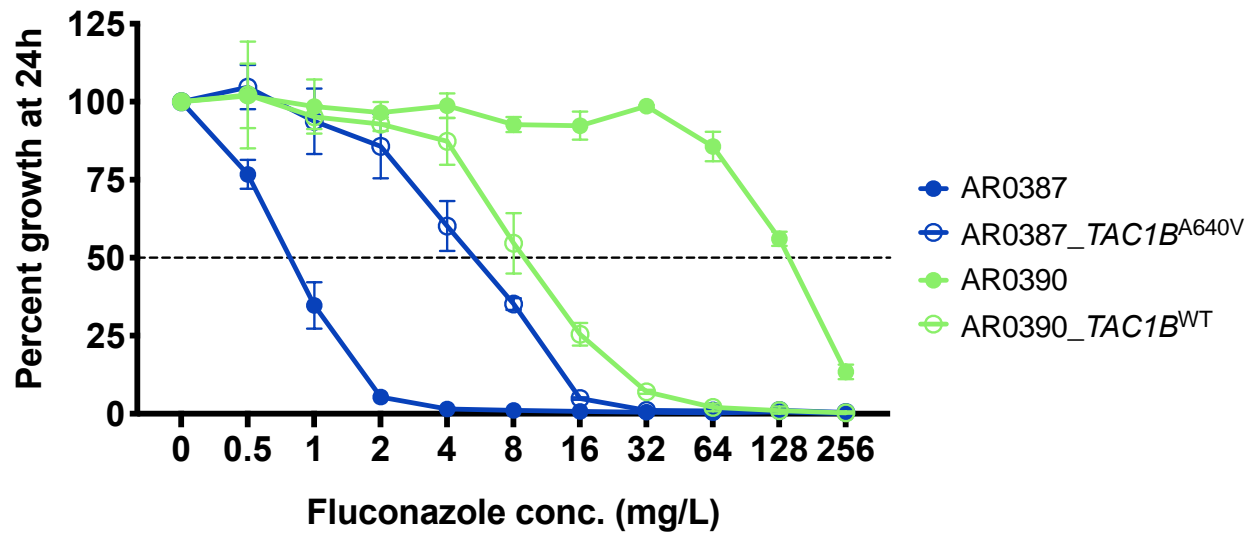

604

605

606 **Figure S1. Copy number variation of *TAC1B* among fluconazole-evolved strains as**  
607 **determined by qPCR.** Gene copy number of *TAC1B* across fluconazole-evolved strains and  
608 parental AR0387 as determined by qPCR with three independent primer sets spanning the open  
609 reading frame and as compared to the housekeeping gene *ACT1*.  
610

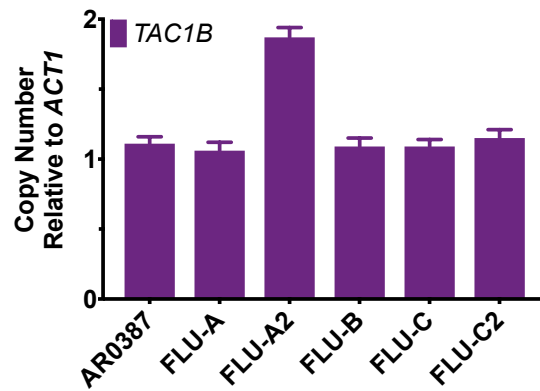

611

612

613



614 **TABLES**

615

616 **Table 1. Sequencing of *C. auris* *MRR1*, *TAC1A*, *TAC1B*, and *UPC2* among fluconazole-**  
617 **evolved strains.**

618

| Gene         | AR0387 | FLU-A        | FLU-A2       | FLU-B        | FLU-C        | FLU-C2       |
|--------------|--------|--------------|--------------|--------------|--------------|--------------|
| <i>MRR1</i>  | WT     | WT           | WT           | WT           | WT           | WT           |
| <i>TAC1A</i> | WT     | WT           | WT           | WT           | WT           | WT           |
| <i>TAC1B</i> | WT     | <b>R495G</b> | <b>R495G</b> | <b>F214S</b> | <b>F214S</b> | <b>F214S</b> |
| <i>UPC2</i>  | WT     | WT           | WT           | WT           | WT           | <b>M365I</b> |

619

620

621

622

623 **SUPPLEMENTARY TABLES**

624

625 **Table S1. *TAC1A* and *TAC1B* mutations observed among global collection of *C. auris***

626 **isolates.** Variants shown in bold are unique to resistant isolates. Variants shown in orange were

627 identified through *in vitro* evolution experiments. Variants shown in yellow were verified to

628 directly contribute to fluconazole resistance. Variants shown in *italics* are uniquely found

629 together. Percent shown represents percent of isolates with the indicated *TAC1B* mutation from

630 the indicated Clade which have fluconazole MIC  $\geq 32$ mg/L.

| GENE                           | VARIANT      | Clade I<br>(n = 126)<br>%(n) | Clade II<br>(n = 7)<br>%(n) | Clade III<br>(n = 51)<br>%(n) | Clade IV<br>(n = 120)<br>%(n) | Total<br>n |
|--------------------------------|--------------|------------------------------|-----------------------------|-------------------------------|-------------------------------|------------|
| <i>TAC1B</i><br>(B9J08_004820) | <b>A15T</b>  | 100(6)                       | 0                           | 0                             | 0                             | 6          |
|                                | S36L         | 0                            | 0                           | 51                            | 120                           | 171        |
|                                | S89Y         | 0                            | 0                           | 51                            | 0                             | 51         |
|                                | S192N        | 100(1)                       | 0                           | 0                             | 0                             | 1          |
|                                | <b>S195C</b> | 100(6)                       | 0                           | 0                             | 0                             | 6          |
|                                | E200K        | 0                            | 0                           | 51                            | 0                             | 51         |
|                                | <b>F214S</b> | 0                            | 50(2)                       | 0                             | 0(1)                          | 3          |
|                                | K215R        | 0                            | 7                           | 51                            | 120                           | 178        |
|                                | K225N        | 0                            | 0                           | 51                            | 0                             | 51         |
|                                | Q226R        | 0                            | 0                           | 51                            | 120                           | 171        |
|                                | <b>K247E</b> | 0                            | 0                           | 0                             | 80(5)                         | 5          |
|                                | I268V        | 0                            | 0                           | 51                            | 0                             | 51         |
|                                | D278V        | 0                            | 0                           | 51                            | 120                           | 171        |
|                                | Q298K        | 0                            | 0                           | 51                            | 0                             | 51         |
|                                | L328Q        | 0                            | 0                           | 0                             | 120                           | 120        |
|                                | C331S        | 0                            | 0                           | 51                            | 120                           | 171        |
|                                | C334F        | 0                            | 0                           | 51                            | 120                           | 171        |
|                                | L335S        | 0                            | 0                           | 51                            | 120                           | 171        |
|                                | S339A        | 0                            | 0                           | 51                            | 120                           | 171        |
|                                | T346I        | 0                            | 0                           | 51                            | 0                             | 51         |
| <b>R495G</b>                   | 100(1)       | 0                            | 0                           | 0                             | 1                             |            |
| Q503R                          | 0            | 0                            | 51                          | 0                             | 51                            |            |
| F580L                          | 0            | 0                            | 51                          | 0                             | 51                            |            |

|                                |                     |          |   |    |          |     |
|--------------------------------|---------------------|----------|---|----|----------|-----|
|                                | <b>A583S</b>        | 100(5)   | 0 | 0  | 0        | 5   |
|                                | <b>P595H</b>        | 0        | 0 | 0  | 100(1)   | 1   |
|                                | <b>P595L</b>        | 100(1)   | 0 | 0  | 0        | 1   |
|                                | P607S               | 0        | 0 | 0  | 0(1)     | 1   |
|                                | Y608H               | 0        | 0 | 51 | 120      | 171 |
|                                | <b>A640V</b>        | 98.2(57) | 0 | 0  | 0        | 57  |
|                                | Y647C               | 0        | 0 | 51 | 0        | 51  |
|                                | A651T               | 0        | 0 | 0  | 37.5(16) | 16  |
|                                | M653V               | 0        | 0 | 0  | 86(6)    | 7   |
|                                | <b>A657V</b>        | 100(15)  | 0 | 0  | 0        | 15  |
|                                | S754N               | 0        | 0 | 51 | 120      | 171 |
|                                | M809I               | 0        | 0 | 51 | 120      | 171 |
|                                | N773_L774del        | 0        | 0 | 51 | 0        | 51  |
|                                | <b>F862_N866del</b> | 0        | 0 | 0  | 97.8(46) | 46  |
| <b>TAC1A</b><br>(B9J08_004819) | V13I                | 0        | 0 | 51 | 120      | 171 |
|                                | S116A               | 0        | 0 | 51 | 120      | 171 |
|                                | V145E               | 0        | 7 | 51 | 120      | 178 |
|                                | G149D               | 0        | 0 | 51 | 0        | 51  |
|                                | A288S               | 0        | 0 | 0  | 120      | 120 |
|                                | E313G               | 0        | 3 | 0  | 0        | 3   |
|                                | P371L               | 1        | 0 | 0  | 0        | 1   |
|                                | D500E               | 0        | 0 | 51 | 120      | 171 |
|                                | E560D               | 0        | 0 | 51 | 120      | 171 |
|                                | E565D               | 0        | 0 | 51 | 0        | 51  |
|                                | S627G               | 0        | 0 | 51 | 0        | 51  |
|                                | K713N               | 0        | 7 | 0  | 0        | 7   |
|                                | E758G               | 0        | 0 | 51 | 0        | 51  |
|                                | S762P               | 0        | 0 | 51 | 120      | 171 |
|                                | A766T               | 0        | 0 | 51 | 0        | 51  |

631

632

633

634

635

636

637

638 **Table S1. Oligonucleotides used in this study**

639

| <b>Primer</b> | <b>Sequence (5'-3')</b> |
|---------------|-------------------------|
| Sequencing    |                         |
| ERG11-SeqAmpF | GCCCTGAAAGAAACCCGTACAC  |
| ERG11-SeqAmpR | GGCACTGGACGCAGGAAC      |
| ERG11-SeqF1   | CCTCATCCATCGACTTGAGTTC  |
| ERG11-SeqR1   | GGCTGGAGCTGGTTTGG       |
| ERG11-SeqF2   | GACTGCCTTGACGAAAGAAGC   |
| ERG11-SeqR2   | GTGTGGGTCGAACTCGTTG     |
| ERG11-SeqF3   | GGTCAGCACACTTCAGCTTC    |
| ERG11-SeqR3   | CTGAGCAGCGTCTCTCTTC     |
| ERG11-SeqF4   | CGTGCAATTGGGCACC        |
| ERG11-SeqR4   | GCCGTATTTCTCTCTGCACAG   |
| ERG3-SeqAmpF  | GTACCTGCGTCCATGTACCATG  |
| ERG3-SeqAmpR  | GGTGGTGGATCACTACGATAGCG |
| ERG3-SeqF1    | CACTCGGAGATCTCTGCC      |
| ERG3-SeqR1    | GGCTGCGAAATCGCACTG      |
| ERG3-SeqF2    | CGTTTACACGGCCTGCAG      |
| ERG3-SeqR2    | CAATCCACTTGTGGTGGGGC    |
| ERG3-SeqF3    | GCCAAAGCGTTGCCAAG       |
| ERG3-SeqR3    | CGGTAGCGTTTTTGCTGCC     |
| ERG3-SeqF4    | GGCTACACTGGCCTTCCG      |
| ERG3-SeqR4    | CCAAGTGGAACCACCATGC     |
| MRR1-SeqAmpF  | GAGGCAGACGAGCGTTTTG     |
| MRR1-SeqAmpR  | GTTGGCAAAGCTGATGGG      |
| MRR1-SeqF1    | CGAGCGGCAATTAACACTTC    |
| MRR1-SeqR1    | CAGGGGTTAGCTAACGCC      |
| MRR1-SeqF2    | CCAACACAACAGCAGTCC      |
| MRR1-SeqR2    | GCTACCGCCTGGTCATCC      |
| MRR1-SeqF3    | GGCGTGCTCTTCAGACAG      |
| MRR1-SeqR3    | GGCATAAGCTTGCAACATCG    |
| MRR1-SeqF4    | GGGCATGAATCGAGAGCC      |
| MRR1-SeqR4    | CATTTTCATCAGAGGTTTGCGC  |
| MRR1-SeqF5    | GGATCATGAGAGATTGTGGCG   |
| MRR1-SeqR5    | GAGTTAGTGATGGAACCTGACGC |
| UPC2-SeqAmpF  | GGCAGCGCACGAACACGC      |
| UPC2-SeqAmpR  | GAGAGCGCCTTTCGTGGTGG    |
| UPC2-SeqF1    | CTCATCCGGGAGTCTTCAG     |
| UPC2-SeqR1    | GCGTGAGGATCGCACTAG      |
| UPC2-SeqF2    | GTGCGGGCTTACTCAATG      |
| UPC2-SeqR2    | CCAAACCTTGTCTTCATCTCC   |

|               |                        |
|---------------|------------------------|
| UPC2-SeqF3    | GCGTTGGTCGCCAGTGC      |
| UPC2-SeqR3    | CTTAGATAGATGCGTTGCGCTG |
| UPC2-SeqF4    | CTCCATGATCGATCCGGAG    |
| UPC2-SeqR4    | GCGGTGTCTTGTCTGGAG     |
| TAC1A-SeqAmpF | CCCACAGGGTCAGACAGAGG   |
| TAC1A-SeqAmpR | GGAGGCGCTTGTGTGCACG    |
| TAC1A-SeqF1   | GGCCGTGCCTAAGCCATC     |
| TAC1A-SeqR1   | CCAAGGGGAAGGTGGTAC     |
| TAC1A-SeqF2   | CGCAGCTCCAGCGGTCTAC    |
| TAC1A-SeqR2   | CCCTCCACGATCGAAATGC    |
| TAC1A-SeqF3   | GGTCCCCGCCATCAGATAC    |
| TAC1A-SeqR3   | GGAGGCAAAGTCCTTCACG    |
| TAC1A-SeqF4   | CAACAGGCTCCCGCTGATG    |
| TAC1A-SeqR4   | CTCCGAGCCGTCATTGAC     |
| TAC1A-SeqF5   | GCCAGAGGTGGTGCCTTC     |
| TAC1A-SeqR5   | CTCGTCCTCCTCCTCACTC    |
| TAC1B-SeqAmpF | CGCTCACACAAAACCTTCG    |
| TAC1B-SeqAmpR | GAAAGCCAATGCGCAGTTGG   |
| TAC1B-SeqF1   | CAGCCATCGGGCAGTGCG     |
| TAC1B-SeqR1   | CAGAGCAATGTGCGCAGCG    |
| TAC1B-SeqF2   | GGACCCACTCGTCGCTGC     |
| TAC1B-SeqR2   | GCGAACCATTGGGCGTG      |
| TAC1B-SeqF3   | GAAGGCATGGCTACTGTGC    |
| TAC1B-SeqR3   | GCTGGAAGAAGTAGGCAAGC   |
| TAC1B-SeqF4   | CCTTCGCAGCTCGACCCC     |
| TAC1B-SeqR4   | GGTGGTTTCAAATGGACCAC   |
| TAC1B-SeqF5   | CGACGACGACCTATTGCTC    |
| TAC1B-SeqR5   | GTCCTCTGGCTTGAGCCTG    |
| RTqPCR        |                        |
| ACT1-F        | GAAGGAGATCACTGCTTTAGCC |
| ACT1-R        | GAGCCACCAATCCACACAG    |
| ERG11-F       | GTTTGCCTACGTGCAATTGG   |
| ERG11-R       | GTAGTCGACTGGTGGGAAGCG  |
| CDR1-F        | GAAATCTTGCCTTCCAGCCC   |
| CDR1-R        | CATCAAGCAAGTAGCCACCG   |
| MDR1-F        | GAAGTATGATGGCGGGTG     |
| MDR1-R        | CCCAAGAGAGACGAGCCC     |
| qPCR          |                        |
| ACT1-F1       | GAAGGAGATCACTGCTTTAGCC |
| ACT1-R1       | GAGCCACCAATCCACACAG    |
| ERG11-F1      | GTTTGCCTACGTGCAATTGG   |
| ERG11-R1      | GTAGTCGACTGGTGGGAAGCG  |
| ERG11-F2      | GGAAGTATGATGGCGGGTG    |
| ERG11-R2      | GGAAGTATGATGGCGGGTG    |
| ERG11-F3      | CACTTGCCCTTGCCCTGC     |

|          |                        |
|----------|------------------------|
| ERG11-R3 | CCTGTCAGGAACGATGTCACC  |
| CDR1-F1  | GAAATCTTGCCTTCCAGCCC   |
| CDR1-R1  | CATCAAGCAAGTAGCCACCG   |
| CDR1-F2  | CGAGGATGGCGTTGCTC      |
| CDR1-R2  | CCTGATGAGCACCAAAACCAG  |
| CDR1-F3  | CTACTGGCTCTTCTGTGGTCTC |
| CDR1-R3  | GTCATAGCAGCCGCGAG      |
| MDR1-F1  | GAAGTATGATGGCGGGTG     |
| MDR1-R1  | CCCAAGAGAGACGAGCCC     |
| MDR1-F2  | GAGAGAGCTTCTTCGGCAG    |
| MDR1-R2  | CCTGCTTCGTCTTTGCC      |
| MDR1-F3  | GTGGTGCTTCTGTGGGTG     |
| MDR1-R3  | CACCAAACAAAGGGCCCG     |
| TAC1B-F1 | CACGCCCAATGGTTCGC      |
| TAC1B-R1 | GGGTGAAGGTGCCTCCATG    |
| TAC1B-F2 | GGAGAACAACCGTGTGCTC    |
| TAC1B-R2 | GTAATCACGTCCAGCAGCG    |
| TAC1B-F3 | CCATGCCTATCGAGCAGC     |
| TAC1B-R3 | GCACAGTAGCCATGCCTTC    |

#### PCR

|             |                                                                           |
|-------------|---------------------------------------------------------------------------|
| TAC1B-AMP-F | TCACCGCGGCATCATCCCCACCGTTGCC                                              |
| TAC1B-AMP-R | TCACGGCCGCATCATCGTTAAAATCGTGGTAAGCATAAC                                   |
| TAC1B-SCN-F | CATCATCCCCACCGTTGCC                                                       |
| TAC1B-SCN-R | GAAAGCCAATGCGCAGTTGG                                                      |
| TAC1B-RT-F  | GACAGCGCAAGAACTATACTTCATC                                                 |
| TAC1B-RT-R  | CAAAGAAAGTCAACATGTTGATTGCTGCTGGCGTAATTCCG<br>TACTCGTTAGGGGCGAATTGGTACCGGG |

#### crRNA target sequence

|                |                      |
|----------------|----------------------|
| TAC1B-5'-crRNA | TCTCGTTCTTCGCCATGAAC |
| TAC1B-3'-crRNA | TTCGTAATCGTTAGCATATG |

---
